# Supplementary material for: Blood-Based Immune Profiling Combined with Machine Learning Discriminates Psoriatic Arthritis from Psoriasis Patients
Source: MDPI journal article supplement (doi:10.3390/ijms222010990), 2021-10-12
Supplement: s1 [file s1]

## SUPPLEMENTARY TABLES

**Supplementary Table S1: FACS staining panels used in this study.**

|                           | <b>FITC<br/>/AF488</b>     | <b>PE</b>                         | <b>ECD</b>                            | <b>PerCp5.<br/>5</b>           | <b>PC7</b>                       | <b>APC<br/>/AF647</b>     | <b>APC-<br/>AF700</b>      | <b>APC-<br/>AF750<br/>/APC-<br/>Cy7</b> | <b>e450<br/>/BV421</b>     | <b>Krome<br/>Orange</b> |
|---------------------------|----------------------------|-----------------------------------|---------------------------------------|--------------------------------|----------------------------------|---------------------------|----------------------------|-----------------------------------------|----------------------------|-------------------------|
| <b>Panel 1<br/>(LMI1)</b> | CD16<br>(clone<br>3G8)     | HLA-DR<br>(clone<br>immu-<br>357) | CD14<br>(clone<br>RMO52)              | CD4<br>(clone<br>13B8.2)       | CD25<br>(clone<br>M-A251)        | CD56<br>(clone<br>N901)   | CD8<br>(clone<br>B9.11)    | CD19<br>(clone<br>J3-119)               | CD3<br>(clone<br>UCHT1)    | CD45<br>(clone<br>J33)  |
| <b>Panel 2<br/>(LMI2)</b> | CD45RA<br>(clone<br>ALB11) | CD3<br>(clone<br>UCHT1)           | CD45RO<br>(clone<br>UCHL1)            | CD27<br>(clone<br>1A4CD2<br>7) | CD25<br>(clone<br>M-A251)        | CD56<br>(clone<br>N901)   | CD127<br>(clone<br>R34.34) | CD8<br>(clone<br>B9.11)                 | CD4<br>(clone<br>13B8.2)   | CD45<br>(clone<br>J33)  |
| <b>Panel 3<br/>(LMI3)</b> | IgD<br>(clone<br>IADB6)    | IgM<br>(clone<br>SA-DA4)          | CD3<br>(clone<br>UCHT1)               | CD27<br>(clone<br>1A4CD2<br>7) | CD38<br>(clone<br>LS198-4-<br>3) | CD24<br>(clone<br>ALB9)   | CD5<br>(clone<br>BL1a)     | CD19<br>(clone<br>J3-119)               | CD20<br>(clone<br>B9E9)    | CD45<br>(clone<br>J33)  |
| <b>Panel 4<br/>(LMI4)</b> | KI67<br>(clone<br>B56)     | HLA-DR<br>(clone<br>immu-<br>357) | CD45RA<br>(clone<br>2H4LDH<br>11LDB9) | CD4<br>(clone<br>13B8.2)       | CD25<br>(clone<br>M-A251)        | Helios<br>(clone<br>22F6) | CD127<br>(clone<br>R34.34) | CD8<br>(clone<br>B9.11)                 | FoxP3<br>(clone<br>PCH101) | CD45<br>(clone<br>J33)  |
| <b>Panel 5<br/>(LMI6)</b> | CD45RA<br>(clone<br>ALB11) | CD196<br>(clone<br>11A9)          | CD8<br>(clone<br>SFCI21T<br>hy2D3)    | CD183<br>(clone<br>G025H7)     | CD194<br>(clone<br>1G1)          | CD25<br>(clone<br>2A3)    | CD4<br>(clone<br>RPA-T4)   | CD195<br>(clone<br>2D7)                 | CD197<br>(clone<br>G043H7) | CD45<br>(clone<br>J33)  |

**Supplementary Table S2: Univariate analysis of peripheral blood cell subsets in Pso vs PsA**

| Cell subsets                       | P-values | Log fold change of Pso vs PsA |
|------------------------------------|----------|-------------------------------|
| CD196+Monocytes                    | 1,78E-05 | 1,49                          |
| CD45RO+CD45RA-                     | 3,57E-05 | 0,77                          |
| CD4+CD196+CD183-CD194+             | 2,06E-04 | -0,62                         |
| CD4+CD197+CD45RA-                  | 2,32E-04 | 0,62                          |
| CD8+CD45RO+CD27-                   | 3,12E-04 | 1,44                          |
| CD8+CD45RA-CD27-                   | 3,14E-04 | 1,47                          |
| CD4+CD25+CD127lo(Treg)             | 3,17E-04 | 0,46                          |
| CD4+CD45RO+CD27-                   | 5,09E-04 | 0,89                          |
| CD4+CD45RA-CD25-CD196-CD183-CD194+ | 1,43E-03 | -0,72                         |
| CD8+CD197+CD45RA+                  | 1,55E-03 | 0,68                          |
| TregFOXP3+Helios+                  | 1,87E-03 | -0,09                         |
| Lymphocytes                        | 2,01E-03 | 0,09                          |
| CD4+CD45RA-CD27-                   | 2,51E-03 | 1,00                          |
| CD19+IgD+CD5++                     | 2,54E-03 | 0,77                          |
| CD45RO-CD45RA+                     | 2,66E-03 | -0,12                         |
| CD4+CD25highTreg                   | 3,51E-03 | -0,27                         |
| CD4+CD196-CD183-CD194+             | 4,08E-03 | -0,57                         |
| TregHLA-DR+                        | 6,62E-03 | 0,49                          |
| CD8+CD196+CD183-CD194+             | 7,40E-03 | -0,74                         |
| KI67+Treg                          | 8,58E-03 | -0,22                         |
| CD194+Monocytes                    | 9,40E-03 | 0,29                          |
| CD4+CD197-CD45RA-                  | 1,15E-02 | -0,19                         |
| CD197+Monocytes                    | 1,27E-02 | 1,36                          |
| CD8+CD196-CD183-CD194+             | 1,57E-02 | -0,74                         |
| CD8+CD197-CD45RA+                  | 1,78E-02 | -0,27                         |
| CD4+                               | 1,83E-02 | 0,01                          |
| Monocytes                          | 2,09E-02 | 0,39                          |
| CD8+CD196+                         | 2,11E-02 | -0,39                         |
| CD8+CD196-                         | 2,11E-02 | 0,21                          |
| CD4+CD45RA-CD25-CD196+CD183+CD194+ | 2,58E-02 | -0,78                         |
| CD24+CD38+                         | 3,22E-02 | -0,01                         |
| CD4+CD45RA-CD25-CD196+CD183-CD194- | 3,48E-02 | 0,32                          |
| CD4+CD45RA-CD25-CD196-CD183-CD194- | 4,09E-02 | 0,27                          |
| CD14+CD16+                         | 5,23E-02 | -0,14                         |
| CD4+CD45RA-CD25-CD196+             | 5,42E-02 | -0,12                         |
| CD4+CD45RA-CD25-CD196-             | 5,42E-02 | 0,23                          |
| CD27-IgM+CD24+CD38high             | 6,14E-02 | 0,45                          |
| IgM+CD38++CD27+                    | 6,16E-02 | 0,62                          |
| CD4+CD45RA+CD27+                   | 6,40E-02 | -0,03                         |
| CD56+CD16-                         | 6,98E-02 | 0,72                          |

|                        |          |       |
|------------------------|----------|-------|
| CD8+                   | 7,64E-02 | 0,34  |
| CD4+CD45RO-CD27-       | 9,43E-02 | 1,87  |
| CD4+CD196-CD183-CD194- | 9,55E-02 | 0,18  |
| IgM-                   | 9,61E-02 | 0,41  |
| CD4+CD196-CD183+CD194- | 1,14E-01 | 0,77  |
| CD8+CD196-CD183-CD194- | 1,15E-01 | 0,19  |
| CD24++CD38++           | 1,16E-01 | 0,43  |
| CD14++CD16-            | 1,32E-01 | 0,24  |
| CD8+CD45RA+CD27+       | 1,45E-01 | -0,02 |
| IgD+CD5+               | 1,46E-01 | 0,07  |
| CD4+CD197-CD45RA+      | 1,47E-01 | -0,46 |
| CD19+                  | 1,48E-01 | 0,52  |
| IgD+IgM+               | 1,66E-01 | 0,04  |
| CD45+                  | 1,66E-01 | 0,22  |
| CD8+CD196+CD183+CD194- | 1,83E-01 | 0,63  |
| CD27-IgM+              | 1,89E-01 | 0,01  |
| CD4+CD45RO-CD27+       | 1,99E-01 | 0,03  |
| IgD-IgM-CD38++         | 2,13E-01 | -0,27 |
| IgD-IgM-CD27-          | 2,17E-01 | 0,33  |
| CD19+CD20-             | 2,18E-01 | 0,54  |
| CD19+CD20+             | 2,18E-01 | 0,12  |
| CD4+CD45RA+CD27-       | 2,41E-01 | 1,33  |
| CD195+Monocytes        | 2,42E-01 | 0,23  |
| CD3-CD19+              | 2,58E-01 | 0,49  |
| CD4+ CD8+ ratio        | 2,65E-01 | -0,08 |
| CD56+CD16+             | 2,76E-01 | 0,12  |
| CD8+CD197-CD45RA-      | 2,81E-01 | -0,03 |
| IgD-IgM-               | 2,85E-01 | 0,32  |
| KI67+CD8               | 3,04E-01 | -0,20 |
| IgD+IgM-               | 3,18E-01 | 0,36  |
| CD4+CD8+               | 3,21E-01 | 1,28  |
| CD4+CD196+CD183+CD194- | 3,24E-01 | 0,45  |
| CD4-CD8-               | 3,26E-01 | 0,24  |
| CD8+CD45RO-CD27-       | 3,45E-01 | -0,17 |
| CD24+CD38+             | 3,49E-01 | 0,11  |
| CD8+CD45RO-CD27+       | 3,50E-01 | 0,03  |
| CD3-CD56+              | 3,57E-01 | -0,06 |
| CD8+CD197+CD45RA-      | 3,59E-01 | 0,35  |
| TregCD25+CD127low      | 3,64E-01 | 0,30  |
| IgD-CD5+               | 3,69E-01 | 0,29  |
| KI67+CD4KI67+CD8ratio  | 3,70E-01 | 0,29  |
| CD8+CD45RA+CD27-       | 4,14E-01 | -0,13 |
| CD4+CD45RA-CD27+       | 4,17E-01 | 0,22  |
| nTreg                  | 4,24E-01 | -0,31 |
| CD14++CD16+            | 4,37E-01 | -0,06 |

|                                    |          |       |
|------------------------------------|----------|-------|
| LeukocytesCD45+                    | 4,39E-01 | 0,17  |
| IgD-CD5++                          | 4,60E-01 | -0,21 |
| CD4CD25-CD127+                     | 5,09E-01 | 0,11  |
| CD4+CD45RA-CD25-CD196-CD183+CD194- | 5,26E-01 | 0,43  |
| NeutrophilsLymphocytesratio        | 5,30E-01 | 0,17  |
| TregCD45RA-                        | 5,36E-01 | 0,19  |
| TregCD45RA+                        | 5,36E-01 | 0,03  |
| IgD+IgM+CD27-                      | 5,74E-01 | 0,11  |
| IgD+IgM+CD27+                      | 5,74E-01 | 0,21  |
| IgD-IgM+                           | 5,78E-01 | -0,07 |
| IgM+CD27-                          | 5,85E-01 | 0,11  |
| CD8+CD45RA-CD27+                   | 5,89E-01 | 0,21  |
| CD8+CD196-CD183+CD194-             | 5,97E-01 | 0,34  |
| KI67+CD4                           | 6,02E-01 | 0,55  |
| IgD-IgM-CD38+CD27+                 | 6,55E-01 | 0,17  |
| CD183+Monocytes                    | 7,61E-01 | 0,04  |
| CD4+CD197+CD45RA+                  | 7,83E-01 | 0,16  |
| IgD-IgM+CD27                       | 7,90E-01 | 0,16  |
| IgD-IgM+CD27-                      | 7,92E-01 | 0,06  |
| CD56++CD16-                        | 8,01E-01 | 0,08  |
| CD24+CD38+IgD+IgM+                 | 8,24E-01 | 0,13  |
| CD24+CD38+CD27+IgM+                | 8,26E-01 | 0,21  |
| IgM+CD38+CD27+                     | 8,28E-01 | 0,17  |
| CD4+CD45RO+CD27+                   | 8,90E-01 | 0,15  |
| CD4+CD196-                         | 8,91E-01 | 0,13  |
| CD4+CD196+                         | 8,91E-01 | 0,15  |
| CD3+CD56+                          | 9,03E-01 | 0,10  |
| CD8+CD45RO+CD27+                   | 9,38E-01 | 0,13  |
| CD3+CD56-                          | 9,43E-01 | 0,14  |
| mTreg                              | 9,44E-01 | 0,12  |
| Neutrophils                        | 9,59E-01 | 0,13  |
| CD14+                              | 9,83E-01 | 0,14  |
| TregFOXP3+Helios-                  | 9,94E-01 | 0,14  |
